# Supplementary material for: Revisiting the reaction of dicarbonyls in aerosol proxy solutions containing ammonia: the case of butenedial
Source: Copernicus journal article supplement (doi:10.5194/acp-21-8809-2021), 2021-06-10
Supplement: Supplementary file 1 [file acp-21-8809-2021-supplement.pdf]

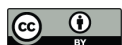

*Supplement of*

## **Revisiting the reaction of dicarbonyls in aerosol proxy solutions containing ammonia: the case of butenedial**

**Jack C. Hensley et al.**

*Correspondence to:* Jack C. Hensley (jhensley@g.harvard.edu) and Frank N. Keutsch (keutsch@seas.harvard.edu)

The copyright of individual parts of the supplement might differ from the article licence.

**Contents**

|           |                                             |
|-----------|---------------------------------------------|
| <b>S1</b> | <b>List of Experiments</b>                  |
| <b>S2</b> | <b>Product Determination</b>                |
| <b>S3</b> | <b>Parametrization of Reaction Kinetics</b> |
| <b>S4</b> | <b>References</b>                           |

**S1 List of Experiments**

**Table S1.** List of experiments performed and their chemical characteristics. Solution nomenclature is carried out through the supplemental information. Nuclear magnetic resonance (NMR) spectroscopy measurements were taken with 500 MHz <sup>1</sup>H-NMR with 64 scans per measurement. [BD]<sub>0</sub> and [NHx]<sub>0</sub> were determined from the mass of each species added to the mixtures. pH was estimated with in-situ quantitative measurements of the NMR shift of an acid.

| Solution     | Measurement            | [BD] <sub>0</sub><br>(M) | [NHx] <sub>0</sub><br>(M) | pH             | Comment                     |
|--------------|------------------------|--------------------------|---------------------------|----------------|-----------------------------|
| BD_H2O_02    | NMR                    | 0.02                     | 0                         | 3 <sup>3</sup> | Butenedial isomer analysis  |
| BD_H2O_25    | NMR                    | 0.25                     | 0                         | 3 <sup>3</sup> | Butenedial isomer analysis  |
| BD_H2O_09    | NMR                    | 0.09                     | 0                         | 3 <sup>3</sup> | Butenedial acetal formation |
| BD_H2O_55    | NMR                    | 0.55                     | 0                         | 3 <sup>3</sup> | Butenedial acetal formation |
| BD_OH_pH8.8  | NMR                    | 0.2                      | 0                         | 8.8            | R1 Fitting                  |
| BD_OH_pH9.5  | NMR, MS <sup>2</sup>   | 0.2                      | 0                         | 9.5            | R1 Fitting                  |
| BD_OH_pH9.8  | NMR                    | 0.2                      | 0                         | 9.8            | R1 Fitting                  |
| BD_OH_pH10.4 | NMR                    | 0.2                      | 0                         | 10.4           | R1 Fitting                  |
| BD_NH_pH3.6  | NMR                    | 0.4                      | 0.4                       | 3.6            | Mechanism Validation        |
| BD_NH_pH5    | NMR, MS <sup>1,2</sup> | 0.9                      | 0.9                       | 4.2-5.7        | R2-R6 Fitting               |

## Supplemental Information

|             |     |     |     |         |                      |
|-------------|-----|-----|-----|---------|----------------------|
| BD_NH_pH8.5 | NMR | 0.9 | 0.2 | 8.5-8.8 | Mechanism Validation |
|-------------|-----|-----|-----|---------|----------------------|

<sup>1</sup>The mass spectrometry (MS) spectra for BD\_NH\_pH5 was taken with a commercial time-of-flight mass spectrometer (JEOL AccuTOF) in positive ion mode only. <sup>2</sup>The MS spectra for BD\_NH\_pH5 and BD\_OH\_pH9.5 was taken with liquid chromatography – mass spectrometry in positive and negative ion mode direct injection, respectively, coupled with UV/Vis absorption measurements spanning 300-450 nm. <sup>3</sup>These pH measurements were taken with litmus paper.

## **S2 Molecular Identification and Quantification**

### **S2.1 Methodology**

The solutions BD\_NH\_pH5 and BD\_OH\_pH9.5 were analyzed to identify reactants and products during reaction. Solutions with identical initial conditions were analyzed separately with MS and <sup>1</sup>H-NMR, aside from the addition of internal standards added to solution to enable quantitation and pH estimation in the case of NMR.

High-resolution LC-MS measurements of each solution were recorded to identify the unambiguous molecular formula of major reaction products. Hexaethylene glycol (PEG-6) was added to BD\_NH\_pH5 as an internal standard for TOF-MS analysis. We did not identify interactions between butenedial and PEG-6 in a previous study (Birdsall et al., 2019). No internal standard was added to BD\_OH\_pH9.5 or BD\_NH\_pH5 for LC-MS analysis.

NMR was performed quantitatively using dilute (1-2% w/w) dimethyl sulfone (DMS) or diethylmalonic acid (DEM) as an internal standard, added to the solution. Concentrations of identified species were calculated with the relative signal intensity of their protons against that of DMS, as is described elsewhere (e.g., Yu et al., 2011). Areas of integration were estimated with MestReNova's line fitting software. The <sup>1</sup>H-NMR spectra showed distinct groups of quantitative related signals that had similar temporal behavior. Each group of peaks whose quantitative signal strength behaved as integers and had the same temporal behavior was presumed to arise from a single compound. A molecular structure was proposed for each cluster of peaks and the molecular formulas mentioned above. In most cases, the quantitation was performed with a subset of the total peaks belonging to a molecule to avoid distortions from neighboring peaks and the background.

S2.2 Butenedial in H<sub>2</sub>O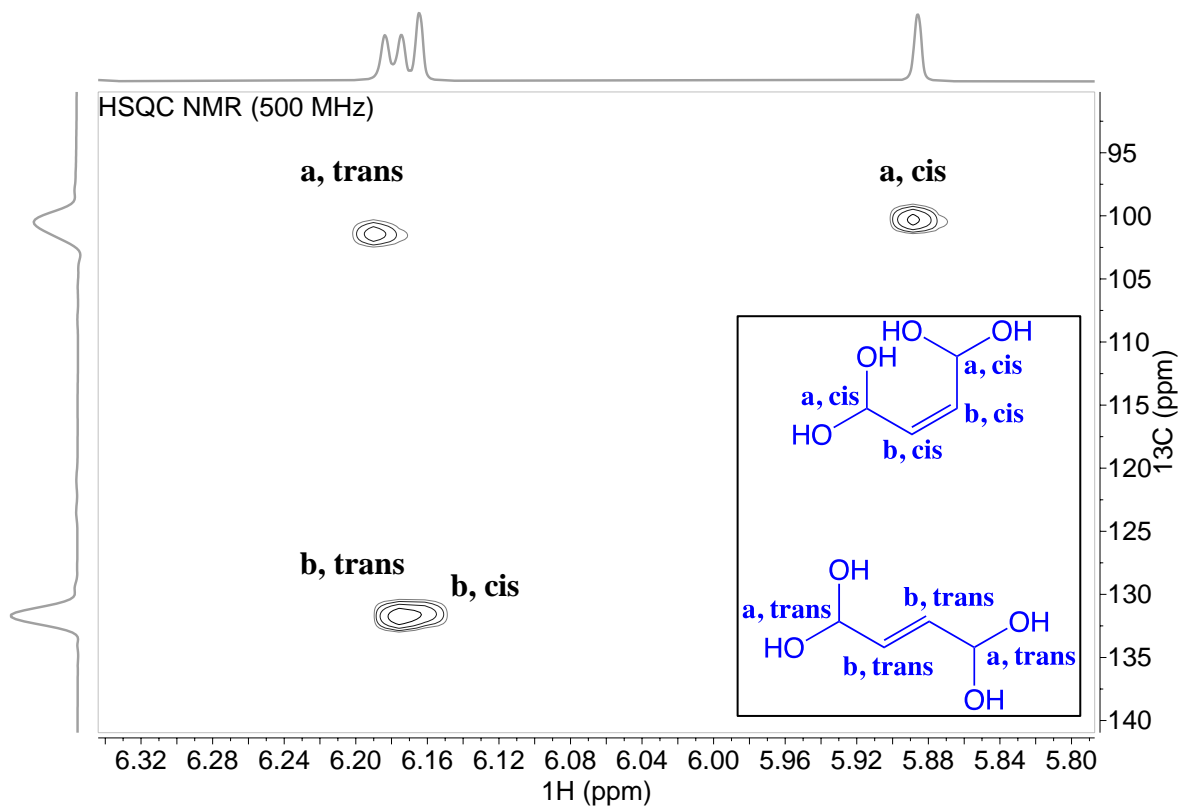

**Figure S1.** HSQC NMR spectrum of concentrated (~0.5 M) butenedial in D<sub>2</sub>O. Butenedial (BD, C<sub>4</sub>H<sub>8</sub>O<sub>4</sub>) is shown in the inset as a dihydrate, the dominant form of butenedial observed in aqueous solution, as both the cis and the trans isomer. The protons are assigned, according to their alphabetical labels, for both the cis and the trans isomer. The proton with chemical shifts 6.17 and 5.86 ppm are assigned to the gem-diol carbon. The protons with chemical shifts 6.16 and 6.15 ppm are assigned to the alkene carbon. The upfield protons of each carbon are assigned to the cis isomer, and the downfield protons to the trans isomer, as is typical. Unhydrated BD was detected with MS at the m/z 85 channel.

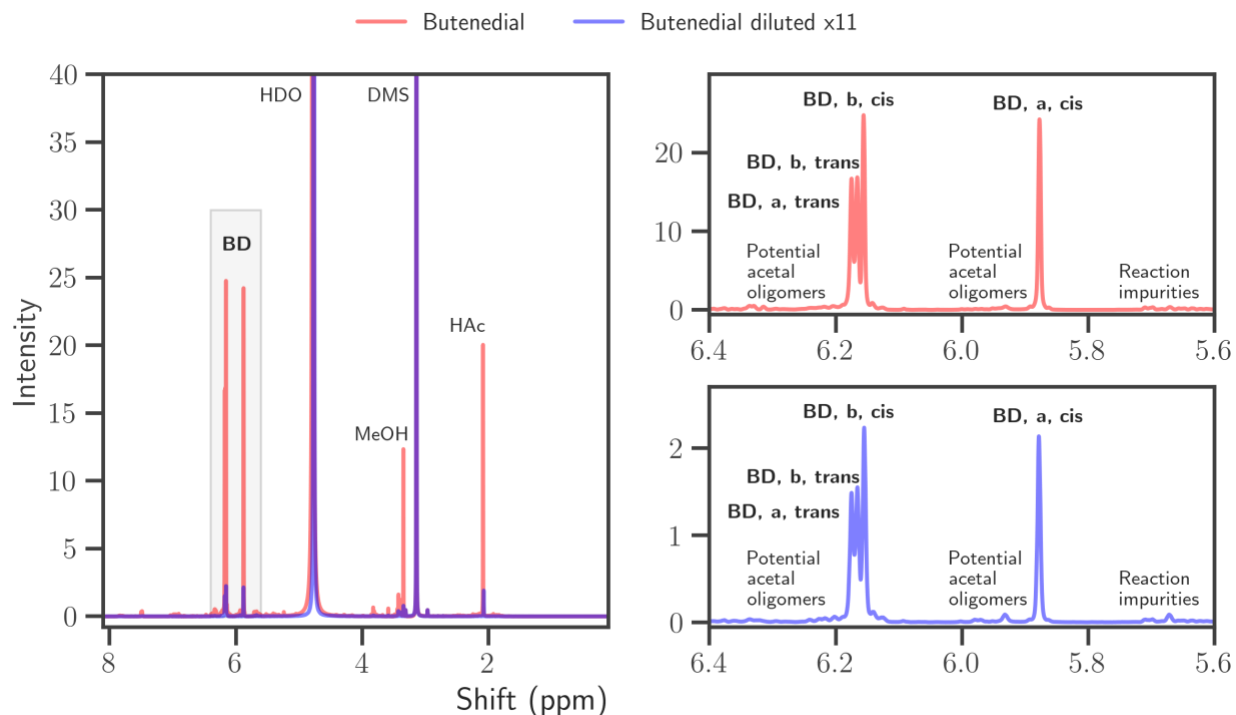

**Figure S2.** Species assignments in  $^1\text{H}$ -NMR spectra of the BD\_H<sub>2</sub>O solutions, where one spectrum is taken of a solution (blue, BD\_H<sub>2</sub>O\_25) from an eleven-fold dilution of the other (red, BD\_H<sub>2</sub>O\_02). An overview spectrum is plotted to the left, and two expanded regions, identified by the shaded box, are plotted on the right for each of the spectra. Major peaks are labeled with their associated chemical compounds and corresponding protons (see Figure S1). The broad singlet at 4.76 is HDO (deuterium substituted water) solvent signal. Dimethyl sulfone (DMS) was the internal standard used as a reference and for quantitation. Acetic acid (HAc) is a nonreactive impurity from butenedial synthesis. Methanol (MeOH) is also detected as a nonreactive byproduct of the reaction.

**Table S2.** Reported quantitation of BD protons (see Figure S3) in BD\_H<sub>2</sub>O solutions. Intensity (I) is reported assuming  $I(\text{DMS}) = 100$ . The ratio of cis to trans is near to unity.

| Proton       | Intensity<br>(BD_H <sub>2</sub> O_25) | Intensity<br>(BD_H <sub>2</sub> O_02) |
|--------------|---------------------------------------|---------------------------------------|
| BD, a, cis   | 25.8                                  | 2.8                                   |
| BD, b, cis   | 25.0                                  | 2.6                                   |
| BD, a, trans | 20.0                                  | 2.4                                   |
| BD, b, trans | 25.0                                  | 2.2                                   |

*Quantification of butenedial acetal oligomerization.*

**Table S3.** Reported quantitation of BD\_H<sub>2</sub>O\_55 and BD\_H<sub>2</sub>O\_09 solutions. Three BD\_H<sub>2</sub>O\_55 solutions were each diluted approximately six-fold to BD\_H<sub>2</sub>O\_09 solutions,

## Supplemental Information

according to the nominal dilution factor reported. The BD dihydrate molarities, measured in-situ, are provided as a comparison against the nominal dilution factor between pairs, to demonstrate if hydration speciation depends on BD concentration. The *maximum* BD acetal oligomer concentration is also presented, which was calculated by assigning the integrated signal intensity between 6.5-6.25 ppm and 6.15-5.9 ppm to a BD acetal dimer (with 8 assignable protons in this range). All values are given as averages and their standard deviations.

| Solution  | Measured [BD dihydrate] | Dilution factor | Measured max [BD acetal oligomer] |
|-----------|-------------------------|-----------------|-----------------------------------|
| BD_H2O_55 | 0.55 ± 0.03 M           | NA              | 0.023 ± 0.002 M                   |
| BD_H2O_09 | 0.089 ± 0.012 M         | 5.86 ± 0.12     | 0.003 ± 0.0005 M                  |

Fratzke et al. (1985) define the equilibrium between monomer and hydrate dimer according to the following relation:

$$K = \frac{[D]}{[M]^2}$$

Where [D] is the hydrated dimer concentration and [M] is the monomer (hydrated or unhydrated) concentration. For glyoxal, K is reported to be 0.56 M<sup>-1</sup> (Fratzke and Reilly, 1986). This results in a dimer concentration of 170 mM at a glyoxal monomer concentration of 0.55 M. Table S2 shows that the maximum butenedial acetal oligomer concentration can be at most 23 mM with 0.55 M butenedial dihydrate. This assumes that all signal specified in the caption to Table S2 corresponds to acetal oligomers and suggests that a tentative upper bound of the K estimate for butenedial is 0.08 M<sup>-1</sup>. However, dilution experiments provide strong evidence that only a very small fraction of this signal corresponds to BD acetal oligomers:

If acetal dimers are formed, a dilution of butenedial solution leads to (1) a statistically significant decrease in butenedial concentration relative to the dilution factor and (2) a quadratic decrease in the dimer concentration compared to the butenedial monomer concentration.

1. The relative butenedial molarity of BD\_H2O\_55 to BD\_H2O\_09 is 6.28 ± 1.20 : 1 and the nominal dilution factor is 5.86 ± 0.12 (determined via the non-reactive standard). Thus, we do not find a significant difference between the nominal and measured concentration of butenedial dihydrate after dilution.
2. The decrease in maximum BD acetal oligomer concentration is 7.31 ± 1.43 from the dilution, which is far from quadratic with respect to the butenedial dihydrate decrease (which would be a factor of ~39). In addition, the upper limit of the observed BD acetal oligomer concentration post dilution, 0.0035M, is identical to the value calculated for the BD acetal oligomer concentration using upper limit of the dilution factor, 5.98, and the lower limit of the observed BD acetal oligomer concentration pre dilution, 0.021M. This indicates that the signal is predominantly from other compounds than acetal oligomers, which should equilibrate rapidly based on analysis of glyoxal acetal oligomers and general chemical considerations.

We therefore find that the presence of butenedial acetal oligomers is minimal, and clearly much less pronounced than for glyoxal.

### S2.3 Butenedial + OH<sup>-</sup> Reaction

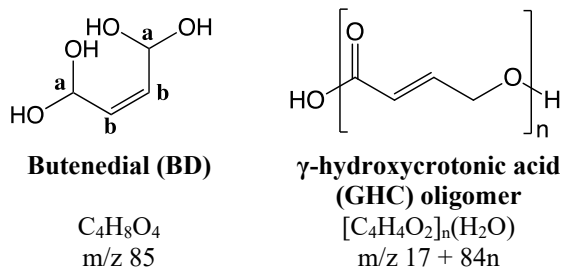

**Figure S3.** Butenedial (BD) and  $\gamma$ -hydroxycrotonic acid (GHC) oligomer structures are shown in the figure above. GHC is an observed reaction product of the BD/OH<sup>-</sup> reaction, which is analogous to other dicarbonyl disproportionation reactions, e.g., glyoxal to glycolic acid. GHC was not explicitly identified with NMR. The unit mass-to-charge ( $m/z$ ) ratios of each species are given. BD dihydrate is the dominant form of BD observed in aqueous solutions. Unhydrated BD was detected with MS and the  $m/z$  ratio of its unhydrated forms is reported. The  $m/z$  ratios of protonated GHC are provided, although deprotonated GHC was detected with LC-MS, as shown in Figure S5 below.

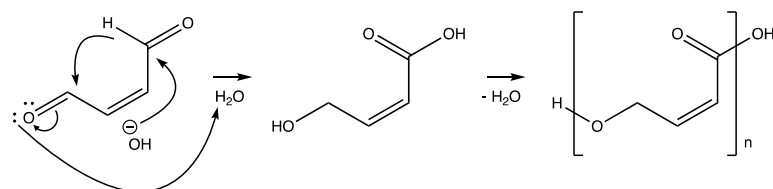

**Figure S4.** Proposed reaction scheme of hydroxycrotonic acid formation via OH<sup>-</sup> substitution of butenedial and the Cannizzaro mechanism.

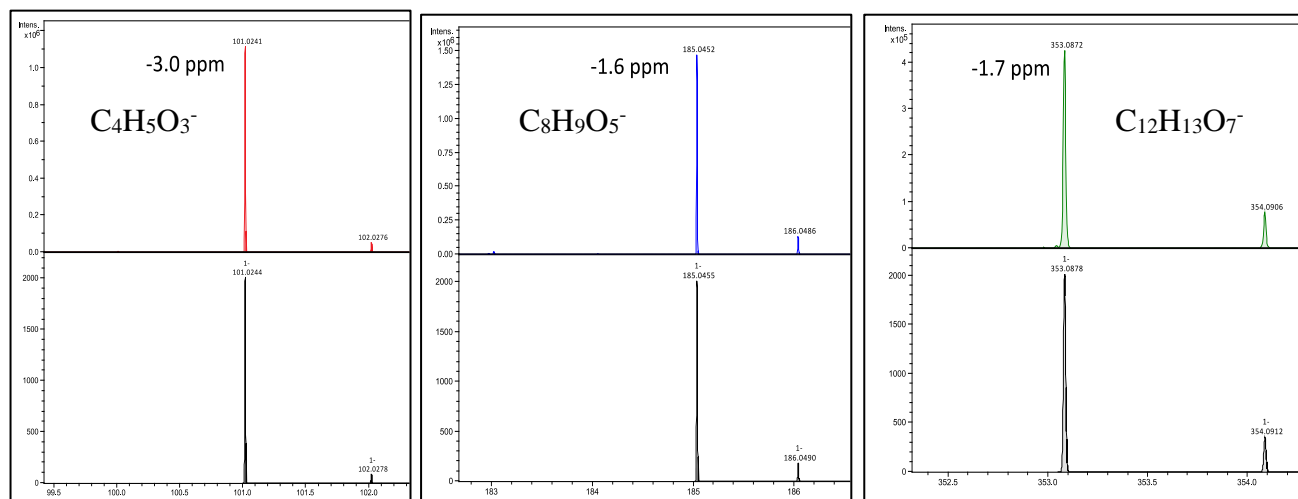

**Figure S5.** LC-MS (negative ion mode) taken of selected products observed in BD\_OH\_pH9.5 after approximately two hours of reaction.  $m/z$  channels 99-102 (left panel), 182-186 (middle



## Supplemental Information

panel), and 352-354 (right panel) are shown as examples. The top row provides the observed mass spectrum and the bottom the theoretical isotopic pattern, which agree closely. Plots are not on equal scales. GHC monomer ( $m/z$  101) dimer ( $m/z$  185), and 4-mer ( $m/z$  353) are observed from left to right. The exact mass is provided over the observed signal. The mass precision is provided in ppm left of the observed signal.

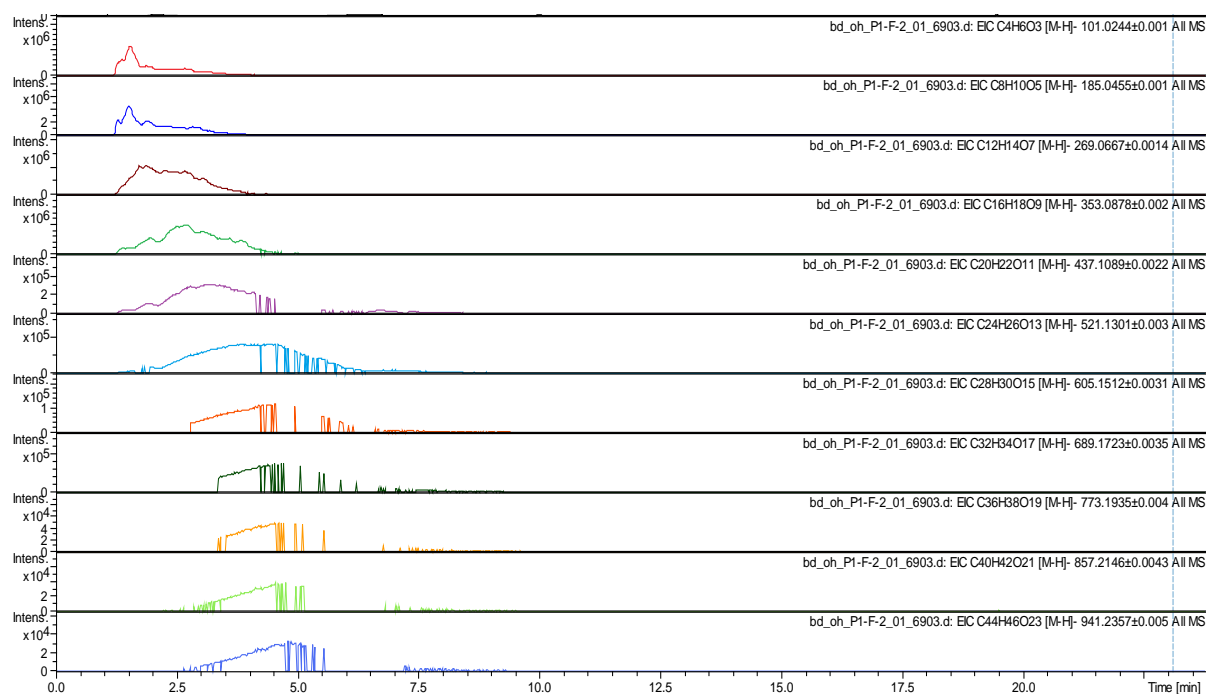

**Figure S6.** UV/Vis chromatogram spectra of selected products in BD\_OH\_pH9.5 samples observed with LC-MS, in negative ion mode. Spectra are plotted as light intensity as a function of time, and given for selected  $m/z$  channels. Absorbance of 300-450 nm light is observed for all selected  $n$ -mers (1-11) of hydroxycrotonic acid, sequentially from top panel to bottom panel.

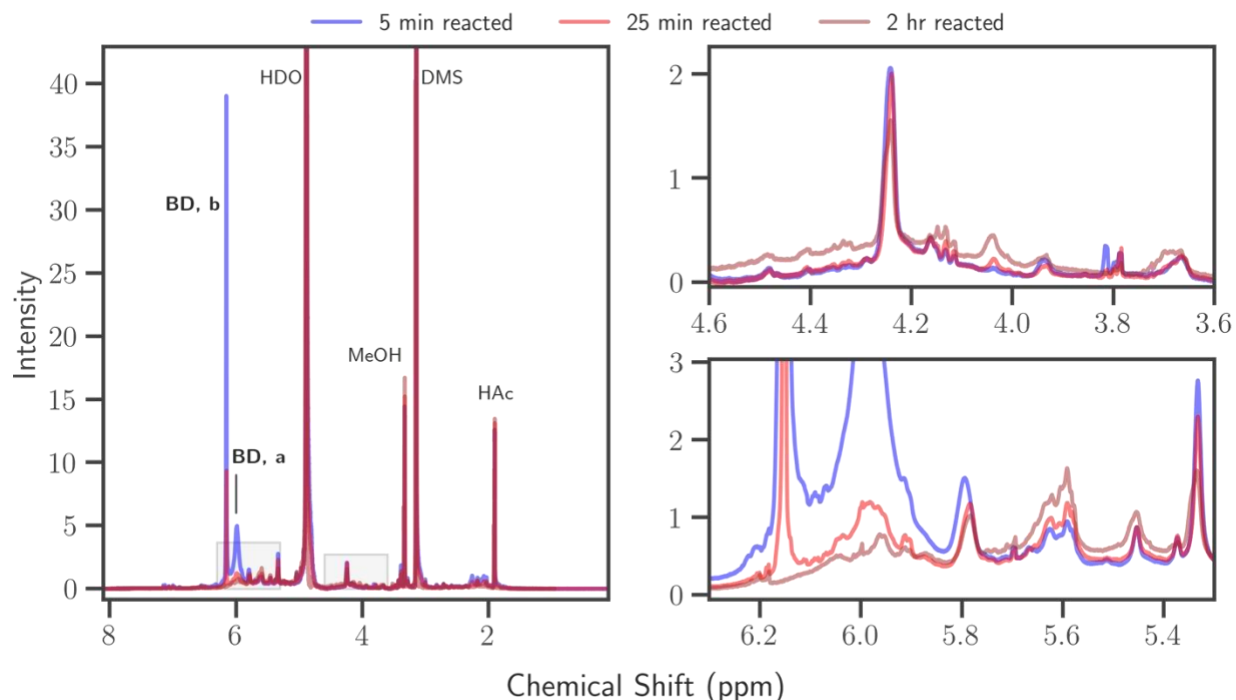

**Figure S7.** Product assignments in  $^1\text{H}$ -NMR spectra of the BD\_OH solution, recorded 5 min (blue), 25 min (red), and 2 hr (brown) after mixing. An overview spectrum is plotted on top, and two expanded regions, identified by the shaded boxes, are plotted on bottom. Major peaks are labeled with their associated chemical compounds and corresponding protons (see Figure S3). The proton used for quantitation is identified with a bolded label. The butenedial gem diol protons are collapsed to one broad peak, as they may be exchanging with the solvent. The broad singlet at 4.76 is HDO (deuterium substituted water) solvent signal. Dimethyl sulfone (DMS) was the internal standard used as a reference and for quantitation. Acetic acid (HAc) is a nonreactive impurity from butenedial synthesis. Methanol (MeOH) is also detected as a nonreactive byproduct of the reaction. The buildup of the baseline at  $\sim 6.2$ -5 and  $\sim 4.5$ -3.6 ppm is expected to be from accretion reactions.

$\delta$  (ppm) of *butenedial dihydrate*: 6.15, 5.96

Notes on quantitation. For BD, the gem diol protons are less affected by the background than the alkene protons, and was therefore used in the quantitation, assuming a 2:1 gem diol to butenedial molar ratio.

**Table S4.** Reported quantitation of BD protons (see Figure S5) in BD\_OH\_pH10.4 solution at 5 min, 25 min, and 2 hr of reaction. Intensity (I) is reported assuming  $I(\text{DMS}) = 100$ . Intensities are insignificant of butenedial at 2 hr reaction. Near integer relationship between the two protons is observed.

| Proton | Intensity (5 min) | Intensity (25 min) | Intensity (2 hr) |
|--------|-------------------|--------------------|------------------|
| BD, a  | 0.425             | 0.141              | 0                |

## Supplemental Information

|       |       |       |   |
|-------|-------|-------|---|
| BD, b | 0.488 | 0.142 | 0 |
|-------|-------|-------|---|

S2.4 Butenedial + NH<sub>x</sub> Reaction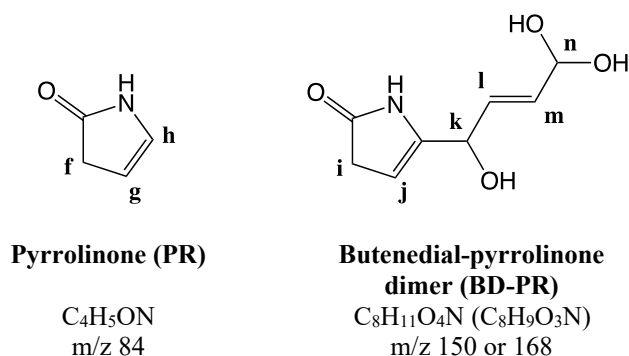

**Figure S8.** Pyrrolinone (PR) and butenedial-pyrrolinone dimer (BD-PR) structures are shown in the figure above. BD-PR hydrate is the dominant forms of BD-PR observed in aqueous solutions. Unhydrated BD-PR was detected with MS and the  $m/z$  ratio of its unhydrated forms is reported. PR and BD-PR are the major reaction products of the BD/NH<sub>x</sub> reaction. The observed mass-to-charge ( $m/z$ ) ratios of each species are given for adducts with H<sup>+</sup>. The protons identified with NMR are labeled alphabetically for those attached to carbon atoms.

**Butenedial/NH<sub>x</sub> Reaction.** We tentatively propose that butenedial/NH<sub>x</sub> reaction proceeds as follows, although reaction intermediates are not observed with NMR or MS. Reaction begins when NH<sub>3</sub> attacks a protonated carbonyl carbon, forming an unstable hemiaminal that dehydrates to produce an imine. The imine can undergo ring closure, forming a hydroxypyrrole. The hydroxypyrrole is in equilibrium with pyrrolinone, which is the stable and favored form in an aqueous medium (Bocchi et al., 1970; Bordner and Rapoport, 1965; Hill et al., 2009). The ketonization of hydroxy heterocycles has been shown to increase with decreasing pH (Capon et al., 1987). As such, the tautomerization of pyrrolinone to the reactive hydroxypyrrole would be OH<sup>-</sup>-dependent. The proposed dimerization of butenedial with pyrrolinone takes place at the carbon adjacent to the NH group, as is typical for aldehyde/pyrrole reactions, e.g., in porphyrin synthesis (Koelsch and Richter, 1935).

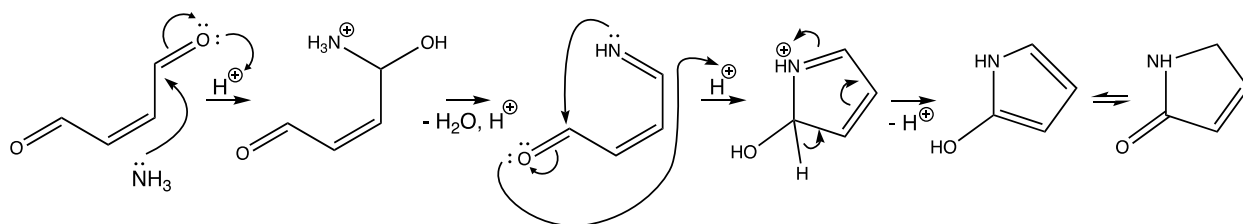

**Figure S9.** Pyrrolinone formation via NH<sub>3</sub> nucleophilic attack of butenedial, through Paul Knorr synthesis of pyrroles.

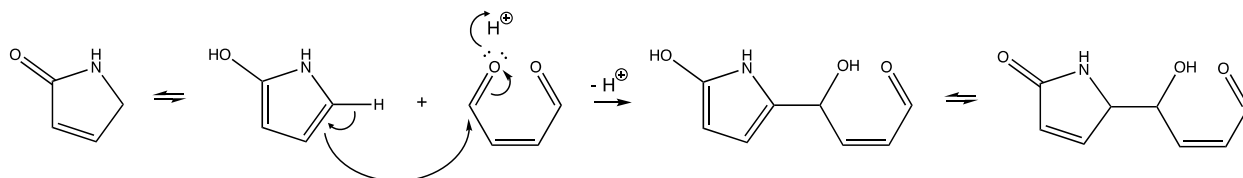

**Figure S10.** Butenedial-pyrrolinone “dimer” formation via butenedial electrophilic substitution reaction with pyrrolinone, analogous to porphyrin synthesis.

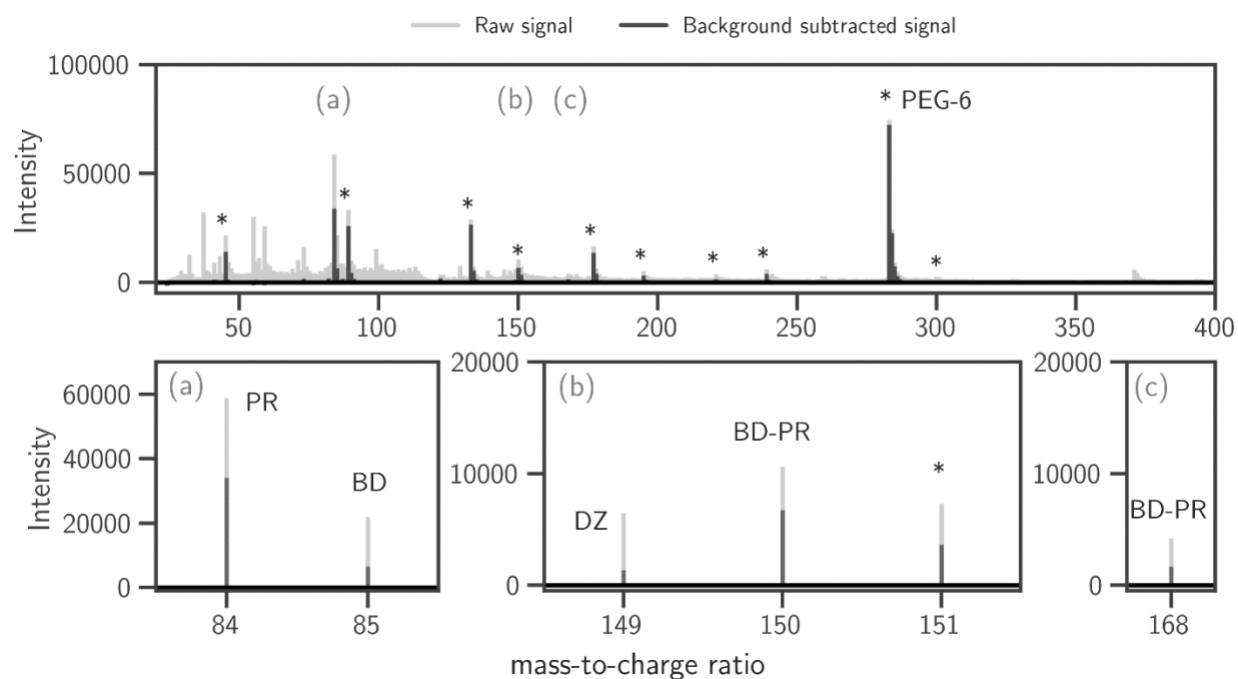

**Figure S11.** Spectrum of BD\_NH\_pH5 solution after ~20 minutes of reaction. Raw (gray) and background-subtracted (black) mass spectra are provided. The full spectrum is shown on the top panel, with lettered expanded regions on the bottom that demonstrate reactant and products. All species observed form adducts with  $H^+$ . Starred peaks correspond to PEG-6, its fragments, and clusters of water with PEG-6 and its fragments. These fragments were identified in previous studies (Birdsall et al., 2018, 2019). The background signal is residual from the experimental apparatus.

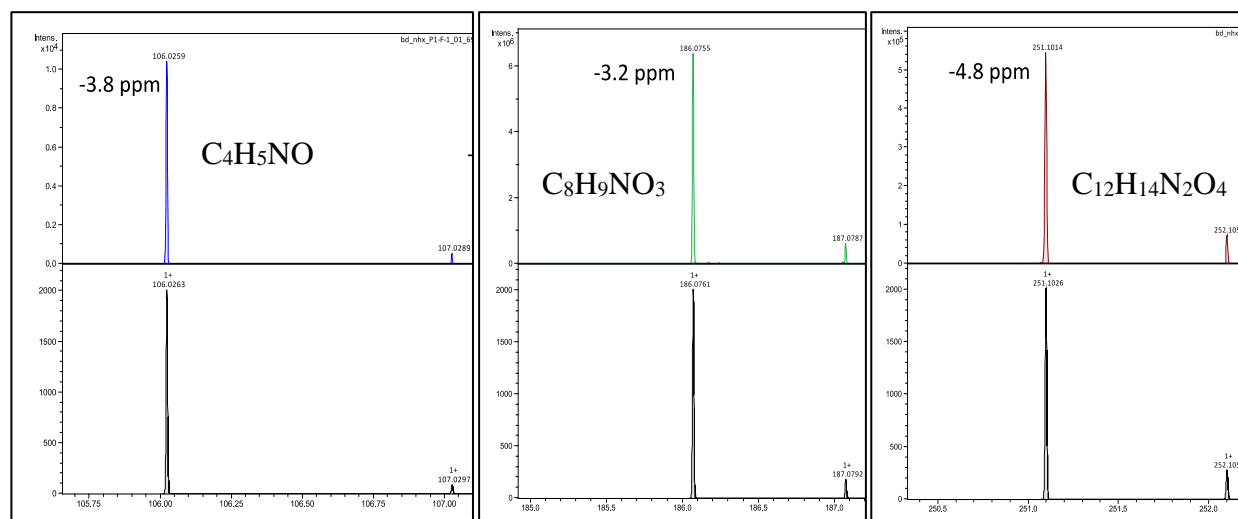

**Figure S12.** LC-MS (positive ion mode) taken of selected products observed in BD\_NHx\_pH5 after approximately two hours of reaction. m/z channels 106-107 (left panel), 185-187 (middle panel), and 250-252 (right panel) are shown as examples. The top row provides the observed mass spectrum and the bottom the theoretical isotopic pattern, which agree closely. Plots are not

## Supplemental Information

on equal scales. Pyrrolinone ( $m/z$  84), butenedial-pyrrolinone “dimer” ( $m/z$  168), and a “trimer” from the addition of butenedial and  $\text{NH}_x$  to the “dimer” ( $m/z$  251) are observed from left to right. The exact mass is provided over the observed signal. The mass precision is provided in ppm left of the observed signal.

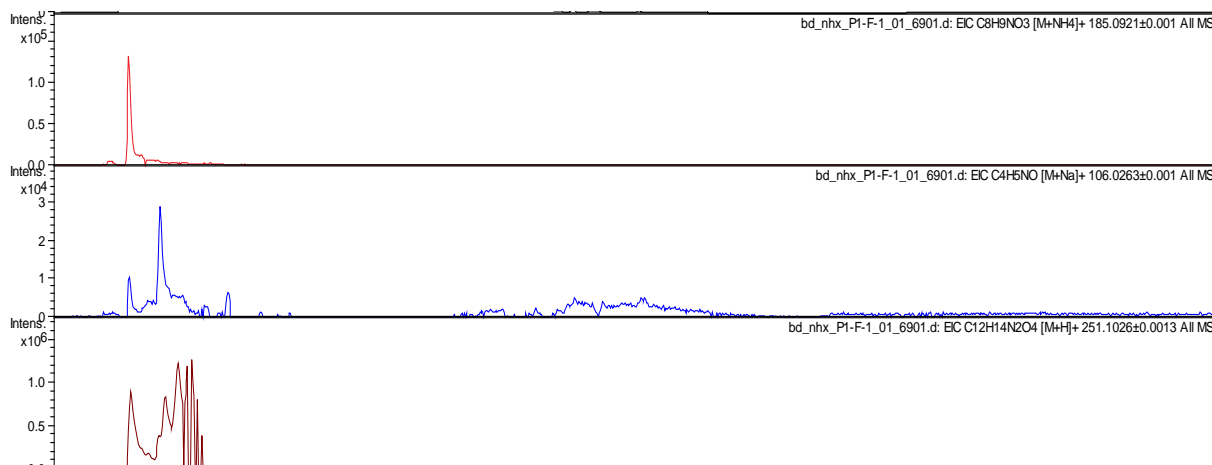

**Figure S13.** UV/Vis chromatogram spectra of selected products in BD\_NHx\_pH5 samples observed with LC-MS, in positive ion mode. Spectra are plotted as light intensity as a function of time, and given for selected  $m/z$  channels. Absorbance of 300-450 nm light is observed for butenedial-pyrrolinone “dimer,” pyrrolinone, and a “trimer” (“dimer” with addition of butenedial and  $\text{NH}_x$ ), sequentially from top panel to bottom panel.

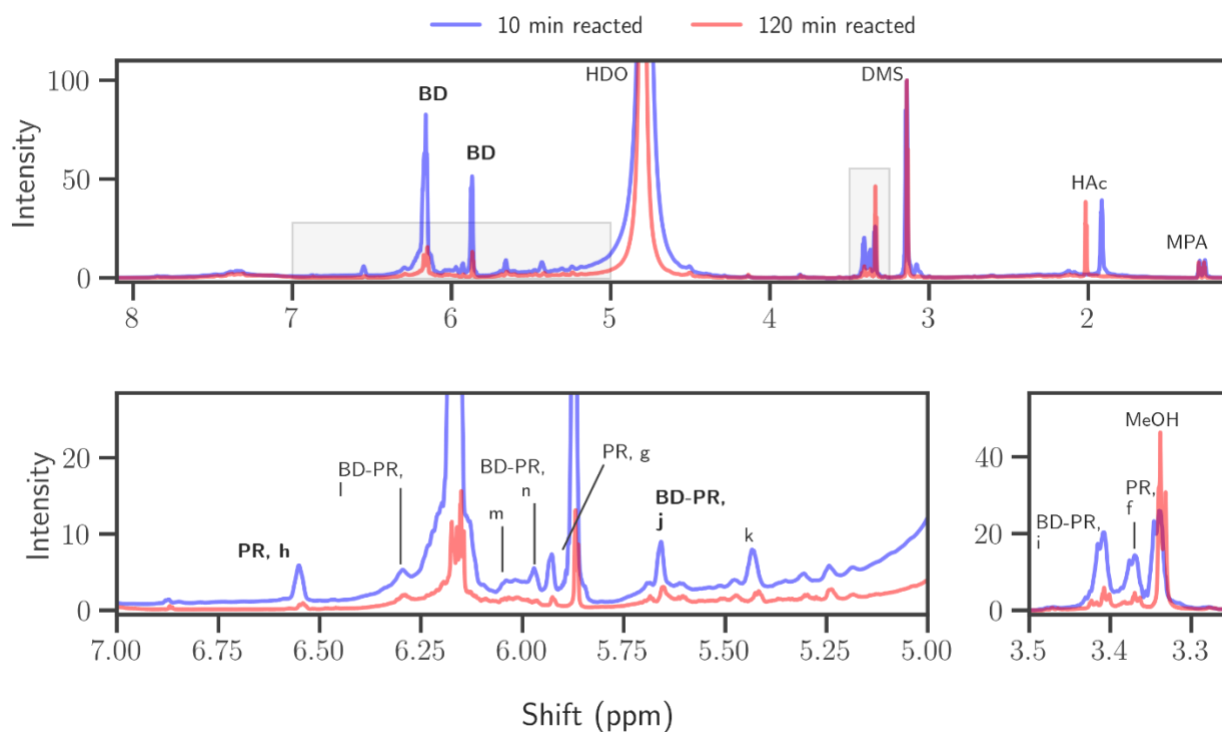

**Figure S14.** Proposed product assignments in  $^1\text{H}$ -NMR spectra of the BD\_NH\_pH5 solution, recorded after 10 min (blue) and 120 min (red) of reaction. An overview spectrum is plotted on top, and two expanded regions, identified by the shaded boxes, are plotted on bottom. Major peaks are labeled with their proposed associated chemical compounds and corresponding protons (see Figure S8). Asterisked labels indicate a proton in the cis or trans isomer. The proton used for quantitation is identified with a bolded label. The broad singlet at 4.76 is HDO (deuterium substituted water) solvent signal. Dimethyl sulfone (DMS) was the internal standard used as a reference and for quantitation. Methylphosphonic acid (MPA) was the internal standard used in conjunction with acetic acid (HAc), a nonreactive impurity from butenedial synthesis, for pH estimation. The change in HAc chemical shift observed between the two spectra is due to speciation changes from acid-base equilibrium. Methanol (MeOH) is also detected as a nonreactive byproduct of the reaction.

Proposed  $\delta$  (ppm) of reactants and products. *Butenedial dihydrate*: 6.17, 6.16, 6.15, 5.86; *pyrrolinone*: 6.55, 5.92, 3.37; *butenedial-pyrrolinone dimer hydrate*: 6.29, 6.03, 5.97, 5.65, 5.43, 3.41.

**Table S5.** Reported quantitation of proposed BD, PR, and BD-PR protons (see Figure S8) in BD\_NH\_pH5 solution at 10 minutes and 120 minutes of reaction. Intensity (I) is reported assuming  $I(\text{DMS}) = 100$ . Intensity of protons from the cis and trans isomer are provided as tuples. In general, proximity to integer relationships is maintained across protons of a species through time. The NH proton was not used in quantitation.

| Proton    | Intensity (10 min) | Intensity (120 min) |
|-----------|--------------------|---------------------|
| BD, cis   | 69                 | 14                  |
| BD, trans | 56                 | 11                  |
| PR, f     | 18                 | 3.7                 |
| PR, g     | 7.4                | 2.0                 |
| PR, h     | 11                 | 2.0                 |
| BD-PR, i  | 32                 | 9.0                 |
| BD-PR, j  | 14                 | 4.0                 |
| BD-PR, k  | 12                 | 4.3                 |
| BD-PR, l  | 12                 | 4.0                 |
| BD-PR, m  | 10                 | N/A <sup>1</sup>    |
| BD-PR, n  | 12                 | N/A <sup>1</sup>    |

<sup>1</sup>The signal of these proposed protons of BD-PR was not resolved with the integration software at 120 minutes, presumably due to overlapping signal.

Notes on quantitation. For BD, the total proton signal was used to perform the quantitation when the BD signal was sufficiently higher than the background, approximately 10 intensity units. The upfield gem-diol proton (a, cis) is less affected by the background than the other protons, and it is observed that the ratio of cis to trans ( $\sim 0.55/0.45$ ) is constant during reaction. At low BD signal intensity, the BD quantitation was performed by multiplying the upfield gem-diol proton

(a, cis) signal by 1.8 to obtain total butenedial concentration, both cis and trans forms. PR quantitation was performed with the downfield alkene proton (h). BD-PR quantitation was performed with the heterocyclic alkene proton (j).

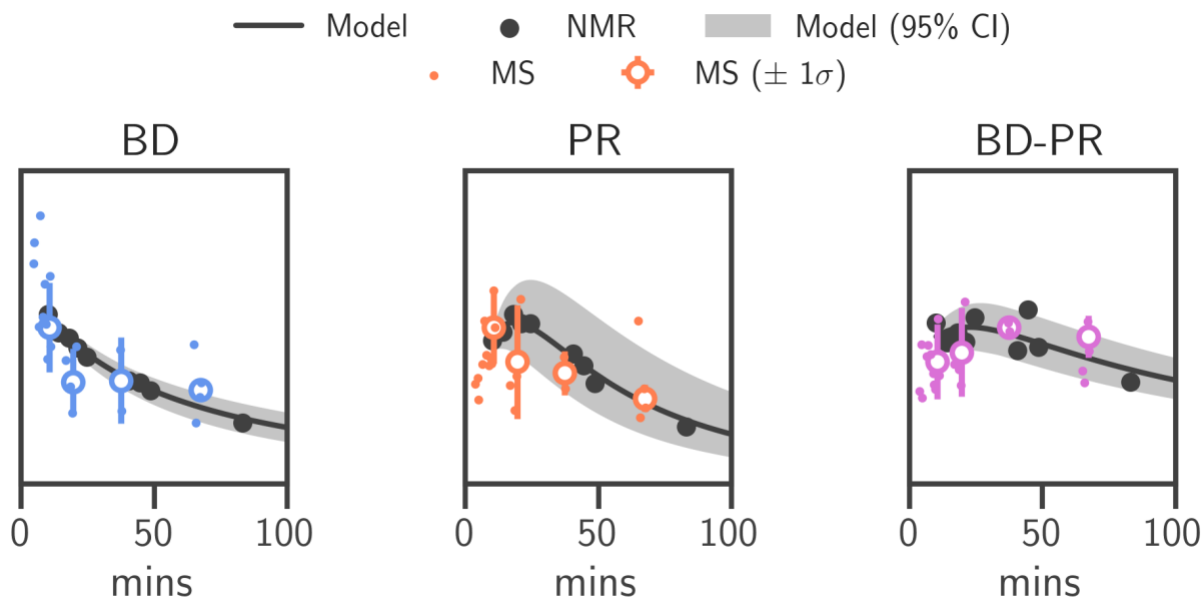

**Figure S15.** Comparison of MS and NMR measurements of butenedial, pyrrolinone, and butenedial-pyrrolinone “dimer” (left to right) in equivalent BD\_NHx\_pH5 reaction mixtures, in arbitrary units. MS measurements are signal of analyte normalized to hexaethylene glycol signal, used as an internal standard that is nonreactive toward butenedial, NMR are reported as concentrations. The kinetic model mechanism output, equivalent to that shown in Figure 3 of the main text is overlaid over each panel.



## S2.5 Images of aqueous solutions during reaction

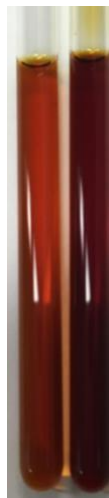

**Figure S16.** BD\_OH\_pH8.8 (left) and BD\_OH\_pH10.4 (right) solutions in an NMR tube after ~40 minutes of reaction. A color change was immediate. No solids were observed in BD\_OH\_pH8.8, BD\_OH\_pH9.5, BD\_OH\_pH9.8, or BD\_OH\_pH10.4 solutions.

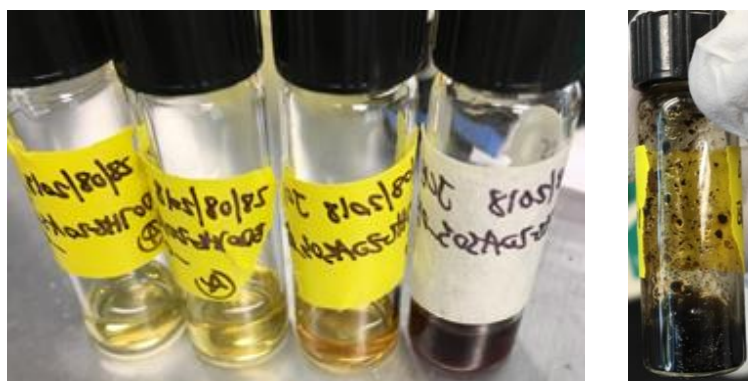

**Figure S17.** Series of 0.4 M BD/0.2 M AS solutions at increasing time of reaction rightward (left). 0.4 M BD/0.2 M AS solution after weeks of reaction (right). Solutions had approximately the same starting composition. The solutions darken over time and solids appear to form. A visible color change to a darker yellow was observed within minutes. Black-brown color was noticeable after hours of reaction. The accumulation of solids occurred on longer timescales (many hours to days). Solids were also observed rapidly (under an hour) in BD/NH<sub>x</sub> solutions with higher pH (e.g., in BD\_NH\_pH8.5 experiments).

### S3 Parametrizations

#### S3.1 pH estimation with NMR

pH estimation with <sup>1</sup>H-NMR is described elsewhere in detail (Wallace et al., 2018). In brief, dilute (<1% w/w) acid is added to solution, and selected such that its pKa ~ solution pH ± 2. Acetic acid is present as an impurity in the starting material and is also used as a pH indicator. The acids used are described in Table S5. pH is calculated from the recorded chemical shift (δ) of the acid via the equation below, where δ<sub>A-</sub> and δ<sub>HA</sub> are the chemical shifts of the deprotonated and protonated acid, respectively. δ<sub>A-</sub> and δ<sub>HA</sub> were recorded in this study and closely match those reported by Wallace et al. (2018).

$$pH = pKa + \log_{10}\left(\frac{\delta_{A-} - \delta}{\delta_{A-} - \delta_{HA}}\right)$$

**Table S6.** pH indicator, relevant quantities, and use in experimental runs of this work.

| Indicator             | pKa                | δ <sub>A-</sub> | δ <sub>HA</sub> | Experiments used                      |
|-----------------------|--------------------|-----------------|-----------------|---------------------------------------|
| Acetic acid           | 4.58 <sup>1</sup>  | 1.90            | 2.09            | BD_NH_pH5, BD_NH_pH3.6                |
| Methylphosphonic acid | 7.78 <sup>1</sup>  | 1.07            | 1.29            | BD_OH_pH8.8, BD_OH_pH9.5, BD_NH_pH8.5 |
| 2,4,6-trimethylphenol | 10.88 <sup>2</sup> | 6.36            | 6.62            | BD_OH_pH9.8, BD_OH_pH10.4             |

<sup>1</sup>Values given by Wallace et al. (2018). <sup>2</sup> Retrieved from: National Center for Biotechnology Information. PubChem Compound Summary for CID 10698, 2,4,6-Trimethylphenol. [https://pubchem.ncbi.nlm.nih.gov/compound/2\\_4\\_6-Trimethylphenol](https://pubchem.ncbi.nlm.nih.gov/compound/2_4_6-Trimethylphenol). Accessed Feb. 9, 2021.

### S3.2 Butenedial/ $\text{OH}^-$ rate constant ( $k_1$ ) vs. pH

The fitting of the rate constant  $k_1$  as a function of pH is shown in Figure S11 below. As mentioned in Section 2, at constant pH, the reaction of dialdehydes with  $\text{OH}^-$  is an apparent first order rate law that is linearly dependent on the dialdehyde. In each experiment, pH was held constant with a carbonate buffer system and monitored with NMR. The decay of butenedial in four experiments at different pH was measured and a first-order linear fit was applied using Python's scipy package. Specifically, the lmfit library with the Levenberg-Marquardt algorithm was used to perform the least squares minimization. A Monte Carlo simulation was performed to derive the reported 95% confidence intervals on model runs. The extracted  $k_1$  values from the model fit, reported for each experiment in Figure S11 below, were used to fit the empirical formulation, demonstrated in Section 3.2 of the main text.

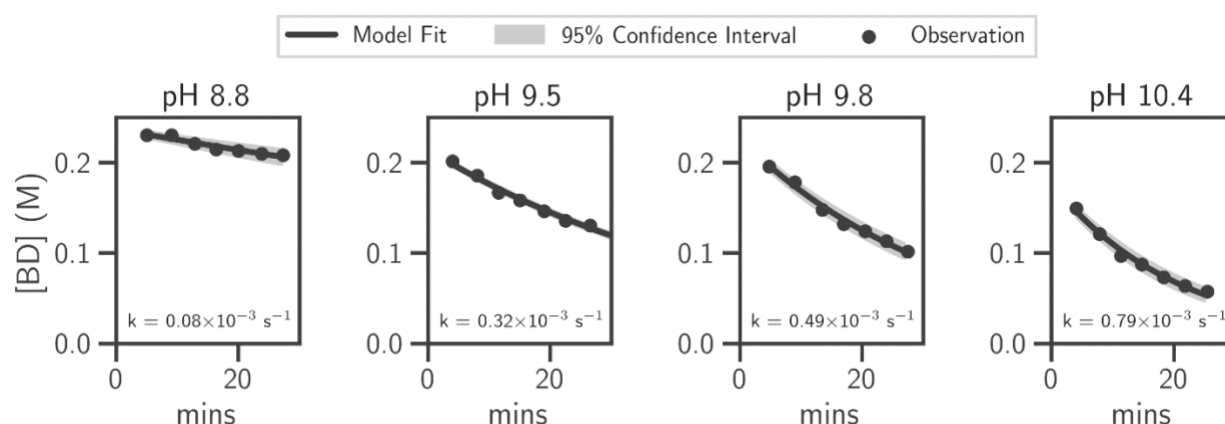

**Figure S18.** The loss of butenedial due to disproportionation reaction with  $\text{OH}^-$  is shown for four experiments at different pH. The pH was held constant and is shown above each panel. Measurements were performed with  $^1\text{H}$ -NMR. Modeled fits were performed with a linear regression of the natural logarithm of the concentration data. First-order rate constants (i.e.,  $k_1$ ) were extracted from the modeled fits and are shown on each panel. 95% confidence interval of the fitting is shown.

### S3.3 pH empirical fit

Experimental pH was observed to closely follow a curve of the form

$$pH(t) = \frac{a t}{b t + c}$$

in BD\_NH\_pH5 and BD\_NH\_pH8.5 observations. pH decrease is observed in glyoxal/NH<sub>x</sub> reactions as well (Yu et al., 2011).

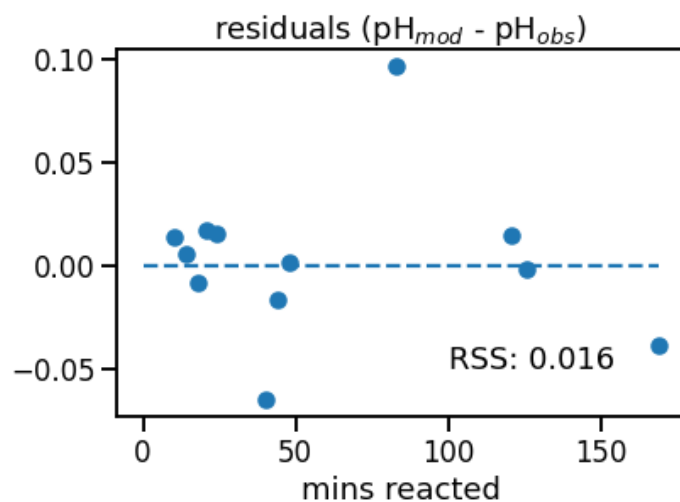

**Figure S19.** Residuals of median estimated and observed pH in BD\_NH\_pH5 measurements are shown below. There is not a clear trend in the residuals, which are all within 0.1 pH units.

### S3.3 Sensitivity of kinetic mechanism to NH<sub>x</sub> estimation

As explained in Section 2 of the main text, NH<sub>x</sub> was not explicitly measured and instead estimated through a 1:1 loss rate with butenedial (i.e., per butenedial lost, one NH<sub>x</sub> is lost). This assumption will overestimate NH<sub>x</sub> loss when butenedial is consumed by accretion reactions that do not additionally consume NH<sub>x</sub>. The sensitivity of the mechanism to the NH<sub>x</sub> estimation technique is assessed by comparing the parametrization against the other extreme scenario: constant NH<sub>x</sub>, i.e., NH<sub>x</sub>(t) = NH<sub>x,0</sub>. The difference in the parameter estimates is a measure of the maximum attainable variability between NH<sub>x</sub> estimation techniques.

$$S_i = \frac{|k_{i,0} - k_{i,1:1}|}{k_{i,1:1}}$$

The sensitivity (S) is calculated by taking the difference between parameter estimates from the constant NH<sub>x</sub> (subscript 0) and 1:1 butenedial and NH<sub>x</sub> loss (subscript 1:1) scenarios, relative to the estimate recorded for the 1:1 loss scenario. For example, a value of 1 indicates that difference in estimates is equal to the estimate. The estimates are taken from model fits to BD\_NH\_pH5 data.

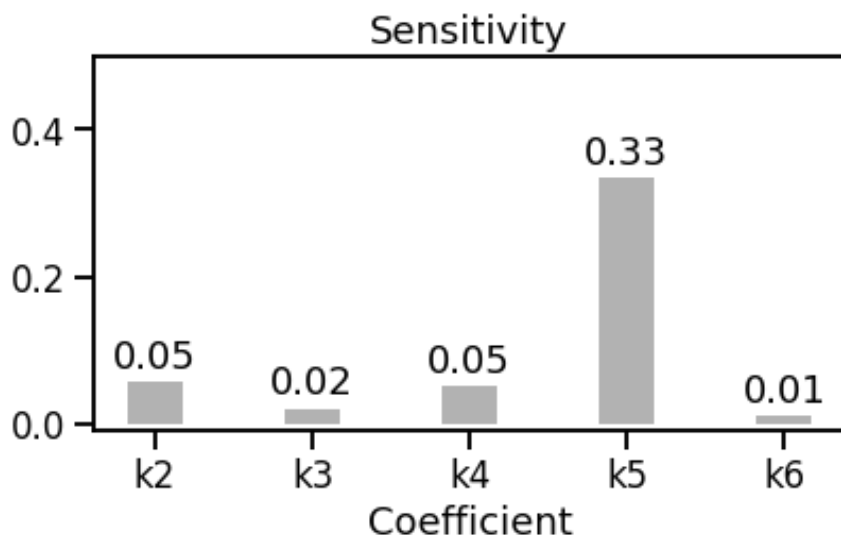

**Figure S20.** Sensitivities of the parameter estimates to NH<sub>x</sub> estimation technique (1:1 NH<sub>x</sub>:butenedial removal or constant NH<sub>x</sub>). Most sensitivities are <0.05 the parameter estimate, indicating that those parameters (k<sub>2</sub>, k<sub>3</sub>, k<sub>4</sub>, k<sub>6</sub>) are not affected significantly by the NH<sub>x</sub> estimation technique. k<sub>5</sub>, i.e., removal of pyrrolinone through accretion reactions, is much more sensitive to the estimation technique. This may indicate that the pyrrolinone removal term is the least constrained of the parameters.

### S3.4 Assessment of reaction mechanism

The kinetic mechanism described in DE1-3 and Table 3 in the main text is evaluated through comparisons against measurements of butenedial taken from different experiments (BD\_NH\_pH3.6 and BD\_NH\_pH8.5). The pH and initial conditions of the experiments, described in Table S1, were taken as model inputs. Model outputs and experimental measurements of butenedial are shown in Figures S14 and S15 and generally indicate that the kinetic mechanism can predict butenedial loss in aqueous solutions containing ammonia at a range of pHs.

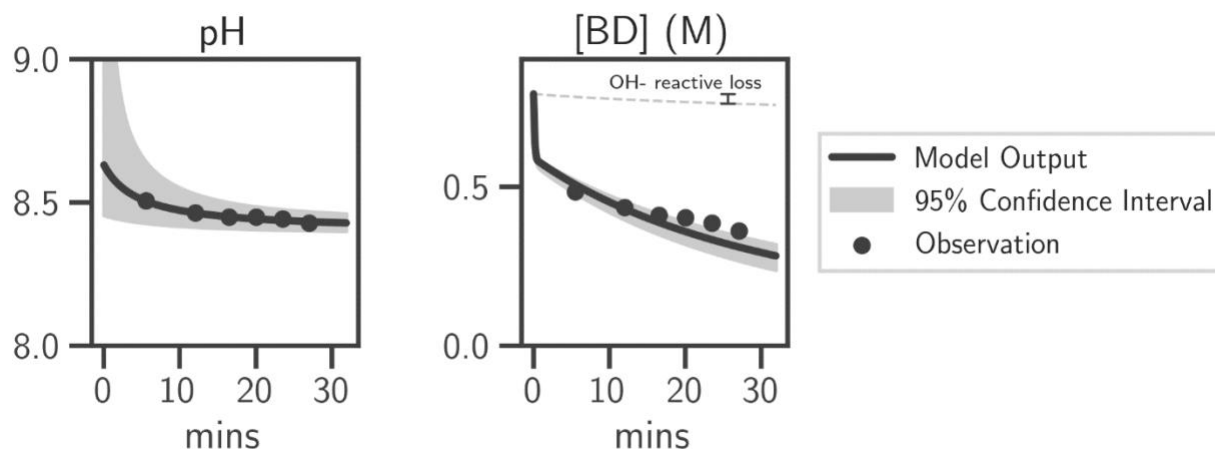

**Figure S21.** Experimental observations of BD\_NH\_pH8.5 against model outputs of the kinetic mechanism taken with the recorded pH and same initial conditions. pH was modeled with an empirical fit described in Equation. The initial pH conditions are poorly constrained by the empirical fit, although the median agrees with a starting pH of >8-9 witnessed with litmus paper. Butenedial is removed rapidly until all NH<sub>x</sub> is consumed. The remaining butenedial decays at a slower pace through accretion reactions. Loss due to reaction with OH<sup>-</sup> is shown to be a minor sink of butenedial at pH 8.5 compared to loss from reaction with NH<sub>x</sub> and accretion reactions.

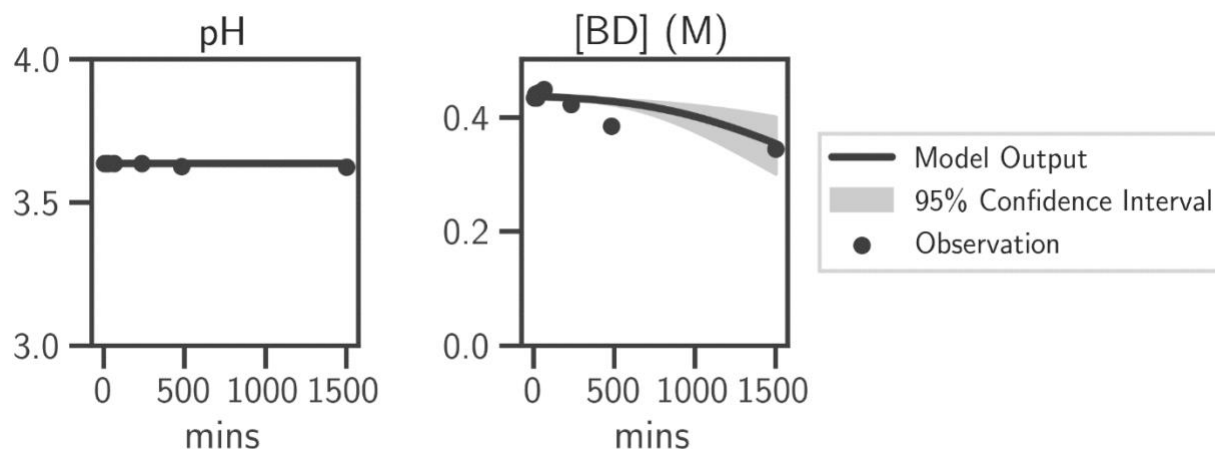

**Figure S22.** Experimental observations of BD\_NH\_pH3.6 against model outputs of the kinetic mechanism taken with the recorded pH and same initial conditions. pH was approximately

constant throughout the experimental run. Modeled butenedial agrees with butenedial measurements generally, with the exception of a slight overestimation compared to the measurement taken at ~500 minutes of reaction.

#### S4 References

- Bader, R. F. W.: Atoms in molecules : a quantum theory, Clarendon Press, Oxford., 1990.
- Birdsall, A. W., Krieger, U. K. and Keutsch, F. N.: Electrodynamic balance–mass spectrometry of single particles as a new platform for atmospheric chemistry research, *Atmos. Meas. Tech.*, 11(1), 33–47, <https://doi.org/10.5194/amt-11-33-2018>, 2018.
- Birdsall, A. W., Hensley, J. C., Kotowitz, P. S., Huisman, A. J. and Keutsch, F. N.: Single-particle experiments measuring humidity and inorganic salt effects on gas-particle partitioning of butenedial, *Atmos. Chem. Phys.*, 19(22), 14195–14209, <https://doi.org/10.5194/acp-19-14195-2019>, 2019.
- Bocchi, V., Chierici, L., Gardini, G. P. and Mondelli, R.: On pyrrole oxidation with hydrogen peroxide, *Tetrahedron*, 26(17), 4073–4082, [https://doi.org/10.1016/S0040-4020\(01\)93048-0](https://doi.org/10.1016/S0040-4020(01)93048-0), 1970.
- Bordner, J. and Rapoport, H.: Synthesis of 2,2'-Bipyrroles from 2-Pyrrolinones <sup>1a</sup>, *J. Org. Chem.*, 30(11), 3824–3828, <https://doi.org/10.1021/jo01022a053>, 1965.
- Capon, B., Guo, B.-Z., Kwok, F.-C. and Wu, Z.-P.: Some studies on the tautomerism of heterocyclic and homocyclic compounds, *Pure and Applied Chemistry*, 59(12), 1577–1584, <https://doi.org/10.1351/pac198759121577>, 1987.
- Fratzke, A. R. and Reilly, P. J.: Thermodynamic and kinetic analysis of the dimerization of aqueous glyoxal, *Int. J. Chem. Kinet.*, 18(7), 775–789, <https://doi.org/10.1002/kin.550180705>, 1986.
- Hill, L., Imam, S., McNab, H. and O'Neill, W.: 3-Hydroxy-1H-pyrrole, *Synthesis*, 2009(15), 2535–2538, <https://doi.org/10.1055/s-0029-1217422>, 2009.
- Wallace, M., Adams, D. J. and Iggo, J. A.: Titrations without the Additions: The Efficient Determination of p *K* <sub>a</sub> Values Using NMR Imaging Techniques, *Anal. Chem.*, 90(6), 4160–4166, <https://doi.org/10.1021/acs.analchem.8b00181>, 2018.
- Yu, G., Bayer, A. R., Galloway, M. M., Korshavn, K. J., Fry, C. G. and Keutsch, F. N.: Glyoxal in Aqueous Ammonium Sulfate Solutions: Products, Kinetics and Hydration Effects, *Environ. Sci. Technol.*, 45(15), 6336–6342, <https://doi.org/10.1021/es200989n>, 2011.
